# Supplementary material for: Effect of environmental noise and music on dexmedetomidine-induced sedation in dogs
Source: PeerJ. 2017 Jul 31;5:e3659. doi: 10.7717/peerj.3659 (PMC5541919; doi:10.7717/peerj.3659)
Supplement: Supplemental Information 1 [file peerj-05-3659-s001.xlsx]

## Sheet: 474
start_date	walk_duration	walk_energy	Average delta-g/s	Av delta-g walk 60s epoch
2017-06-16T20:45:00+00:00	79.8	341	4.27318	256.391
2017-06-16T21:00:00+00:00	376.9	1532	4.06474	243.884
2017-06-16T21:15:00+00:00	637.6	3193	5.00784	300.471
2017-06-16T21:30:00+00:00	626.6	2941	4.69358	281.615
2017-06-16T21:45:00+00:00	678.8	3417	5.03388	302.033
2017-06-16T22:00:00+00:00	831.1	3211	3.86355	231.813
2017-06-16T22:15:00+00:00	177	779	4.40113	264.068
2017-06-16T22:30:00+00:00	93.3	272	2.91533	174.92
2017-06-16T22:45:00+00:00	46	120	2.6087	156.522
			4.09577	245.746
